# Supplementary material
Source: PubMed Central journal article supplement (PMC3585081)
Supplement: supp_M112.419184_jbc.M112.419184-1.pdf [file supp_M112.419184_jbc.M112.419184-1.pdf]

## Supplementary Materials

### Primary antibodies used in IHC

| Antigen          | Vendor                | Catalogue number | Dilution |
|------------------|-----------------------|------------------|----------|
| SOX9             | A gift from M. Wegner | O9-1             | 1: 3,000 |
|                  | Millipore             | AB5535           | 1: 2,000 |
| LRP6             | Abgent                | AP6158a          | 1:400    |
| TCF4             | Lifespan              | LS-C50064        | 1: 2,000 |
| $\beta$ -Catenin | BD transduction       | 6101054          | 1:5,000  |

### Primary antibodies used in immunoblotting

| Antigen                  | Vendor                | Catalogue number | Dilution |
|--------------------------|-----------------------|------------------|----------|
| SOX9                     | A gift from M. Wegner | O9-1             | 1: 5,000 |
|                          | Millipore             | AB-5535          | 1:3,000  |
| LRP6                     | Cell Signaling        | 2560             | 1:2,000  |
| TCF4                     | Millipore             | 05-512           | 1: 1,000 |
| $\beta$ -Catenin         | BD transduction       | 6101054          | 1:10,000 |
| active- $\beta$ -Catenin | Millipore             | 05-665           | 1:1,000  |
| Axin2                    | Epitomics             | 3456-1           | 1:1,000  |
| $\beta$ -Actin           | Abcam                 | ab-6276          | 1:10,000 |
| GAPDH                    | Abcam                 | ab-9485          | 1: 5,000 |

### siRNA.

The following siRNAs were purchased from Dharmacon. SOX9 siRNAs were as follows (positive strands): SOX9i A: 5' GCAGCGACGUCAUCUCCAAUU-3', SOX9i B: 5'-CAACGAGUUUGACCAGUACUU-3', and control siRNA (Dharmacon, siCONTROL Non-Targeting siRNA #1, D-001210-01).

### Real-time RT-PCR.

The primer sequences for human SOX9 were: 5'- TATGACTGGACCCTGGTG-3' (forward); 5'-TGTGGCTTGTCTTCTGCTGG-3' (reverse) and 5' TGCCGGTGCGCGTCAACG-3' (probe).

The assay primer/probe sets for TCF4, LRP6 and 18S human rRNA was purchased from ABI (TCF4-1, Hs01009038; TCF4-2, Hs01009053; LRP6, Hs00233935 and 18S, Hs99999901).

The primers for Axin2 were: Forward: 5'-ACCAAACTTTACGAGTAGCCAA; and Reverse: 5'-TGCTGTTGTTCTCAATGTACCTT (SYBR Green TaqMan real time rt-PCR).

### Chromatin Immunoprecipitation

The primer sequences for promoter (P1 and P2) and exon or intron regions (C1 and C2) are listed below (numbered from the translational initiation site).

| Primer ID | Sequence 5'-3'                                           | Product sizes |
|-----------|----------------------------------------------------------|---------------|
| P1        | -1247 CGTTTTGGCATATCCATCCT<br>-1075 AAAGATCAACCCTCCGCTTT | 173 bp        |
| P2        | -372 CACCTCCTGTATCTTCGGCT<br>-212 GCGTGAGTTTGGGTTTCTTT   | 161 bp        |
| C1        | +600 CTCGGCCTGGCCCTGCGCCG<br>+810 GGCTCGTCAGGTCGGGGATC   | 211 bp        |
| C2        | +817 TCCCCAACGGATCGCTCTCG<br>+1058 GAAGTGCAAACAAATCCAGT  | 242 bp        |

**Genotyping primers for transgenic mice.**

tetO-SOX9 PCR primers:

5'-primer F: 5' GAG TCG AGG TCG ACG GTA TCG 3'

3'-primer R: 5' CTG AGC TCG GCG TTG TGC AAG 3'

MMTV-rtTA PCR primers:

5'-primer F: 5' GCT AGG TGT AGA GCA GCC TAC ATT G 3'

3'-primer R: 5' GGC GGC ATA CTA TCA GTA GTA GGT G 3'
